# Supplementary material
Source: PubMed Central journal article supplement (PMC2873118)
Supplement: NIHMS189718-supplement-01.pdf [file NIHMS189718-supplement-01.pdf]

| Symbol             | Description                                                                             | Size (bp) | Symbol              | Description                                                              | Size (bp) |
|--------------------|-----------------------------------------------------------------------------------------|-----------|---------------------|--------------------------------------------------------------------------|-----------|
| Apaf1              | Apoptotic peptidase activating factor 1                                                 | 128       | Fadd                | Fas (TNFRSF6)-associated via death domain                                | 183       |
| Api5_predicted     | Apoptosis inhibitor 5 (predicted)                                                       | 113       | Faim                | Fas apoptotic inhibitory molecule                                        | 183       |
| Aven_predicted     | Apoptosis, caspase activation inhibitor (predicted)                                     | 181       | Gadd45a             | Growth arrest and DNA-damage-inducible 45 alpha                          | 133       |
| Bad                | Bcl2-associated death promoter                                                          | 158       | Il10                | Interleukin 10                                                           | 102       |
| Bag1_predicted     | Bcl2-associated athanogene 1 (predicted)                                                | 100       | Lhx4_predicted      | LIM homeobox protein 4 (predicted)                                       | 191       |
| Bak1               | BCL2-antagonist/killer 1                                                                | 126       | Lta                 | Lymphotoxin A                                                            | 164       |
| Bax                | Bcl2-associated X protein                                                               | 108       | Ltbr                | Lymphotoxin B receptor                                                   | 166       |
| Bcl10              | B-cell CLL/lymphoma 10                                                                  | 127       | Mapk8ip             | Mitogen activated protein kinase 8 interacting protein                   | 90        |
| Bcl2               | B-cell leukemia/lymphoma 2                                                              | 104       | Mcl1                | Myeloid cell leukemia sequence 1                                         | 100       |
| Bcl2a1             | B-cell leukemia/lymphoma 2 related protein A1                                           | 107       | Nfkb1               | Nuclear factor of kappa light chain gene enhancer in B-cells 1, p105     | 156       |
| Bcl2l1             | Bcl2-like 1                                                                             | 183       | Nol3                | Nucleolar protein 3 (apoptosis repressor with CARD domain)               | 152       |
| Bcl2l11            | BCL2-like 11 (apoptosis facilitator)                                                    | 94        | Polb                | Polymerase (DNA directed), beta                                          | 158       |
| Bcl2l2             | Bcl2-like 2                                                                             | 92        | Prdx2               | Peroxiredoxin 2                                                          | 187       |
| Bclaf1             | BCL2-associated transcription factor 1                                                  | 82        | Prlr                | Prolactin receptor                                                       | 73        |
| Bid                | BH3 interacting domain death agonist                                                    | 92        | Prok2               | Prokineticin 2                                                           | 87        |
| Bid3               | BH3 interacting (with BCL2 family) domain, apoptosis agonist                            | 161       | Pycard              | PYD and CARD domain containing                                           | 164       |
| Bik                | Bcl2-interacting killer                                                                 | 108       | Ripk2               | Receptor (TNFRSF)-interacting serine-threonine kinase 2                  | 158       |
| Birc1b             | Baculoviral IAP repeat-containing 1b                                                    | 104       | Sphk2               | Sphingosine kinase 2                                                     | 189       |
| Birc3              | Baculoviral IAP repeat-containing 3                                                     | 192       | Tnf                 | Tumor necrosis factor (TNF superfamily, member 2)                        | 59        |
| Birc4              | Baculoviral IAP repeat-containing 4                                                     | 148       | Tnfrsf10b_predicted | Tumor necrosis factor receptor superfamily, member 10b (predicted)       | 176       |
| Birc5              | Baculoviral IAP repeat-containing 5                                                     | 73        | Tnfrsf11b           | Tumor necrosis factor receptor superfamily, member 11b (osteoprotegerin) | 183       |
| Bnip1              | BCL2/adenovirus E1B 19kDa-interacting protein 1                                         | 118       | Tnfrsf1a            | Tumor necrosis factor receptor superfamily, member 1a                    | 149       |
| Bnip2_predicted    | BCL2/adenovirus E1B 19kDa-interacting protein 1, NIP2 (predicted)                       | 101       | Tnfrsf1b            | Tumor necrosis factor receptor superfamily, member 1b                    | 191       |
| Bnip3              | BCL2/adenovirus E1B 19 kDa-interacting protein 3                                        | 138       | Tnfrsf5             | Tumor necrosis factor receptor superfamily, member 5                     | 109       |
| Bok                | Bcl-2-related ovarian killer protein                                                    | 122       | Fas                 | Fas (TNF receptor superfamily, member 6)                                 | 68        |
| Card10_predicted   | Caspase recruitment domain family, member 10 (predicted)                                | 83        | Tnfsf10             | Tumor necrosis factor (ligand) superfamily, member 10                    | 82        |
| Card6_predicted    | Caspase recruitment domain family, member 6 (predicted)                                 | 179       | Tnfsf12             | Tumor necrosis factor ligand superfamily member 12                       | 123       |
| Casp1              | Caspase 1                                                                               | 178       | Cd40lg              | CD40 ligand                                                              | 165       |
| Casp4              | Caspase 4, apoptosis-related cysteine peptidase                                         | 99        | Faslg               | Fas ligand (TNF superfamily, member 6)                                   | 120       |
| Casp12             | Caspase 12                                                                              | 82        | Tp53                | Tumor protein p53                                                        | 87        |
| Casp14_predicted   | Caspase 14 (predicted)                                                                  | 167       | Tradd               | TNFRSF1A-associated via death domain                                     | 159       |
| Casp2              | Caspase 2                                                                               | 144       | Traf1               | Transcribed locus, strongly similar to NP_033447.2                       | 205       |
| Casp3              | Caspase 3, apoptosis related cysteine protease                                          | 105       | Traf2_predicted     | Tnf receptor-associated factor 2 (predicted)                             | 142       |
| Casp6              | Caspase 6                                                                               | 151       | Traf3_predicted     | Tnf receptor-associated factor 3 (predicted)                             | 176       |
| Casp7              | Caspase 7                                                                               | 190       | Traf4_predicted     | Tnf receptor associated factor 4 (predicted)                             | 155       |
| Casp8              | Caspase 8                                                                               | 114       | Trp53bp2_predicted  | Transformation related protein 53 binding protein 2 (predicted)          | 177       |
| Casp8ap2_predicted | Caspase 8 associated protein 2 (predicted)                                              | 173       | Trp63               | Transformation related protein 63                                        | 188       |
| Casp9              | Caspase 9                                                                               | 99        | Trp73_predicted     | Transformation related protein 73                                        | 99        |
| Cflar              | CASP8 and FADD-like apoptosis regulator                                                 | 125       |                     |                                                                          |           |
| Cidea_predicted    | Cell death-inducing DNA fragmentation factor, alpha subunit-like effector A (predicted) | 83        |                     |                                                                          |           |
| Cideb_predicted    | Cell death-inducing DNA fragmentation factor, alpha subunit-like effector B (predicted) | 124       |                     |                                                                          |           |
| Cradd              | CASP2 and RIPK1 domain containing adaptor with death domain (predicted)                 | 134       |                     |                                                                          |           |
| Dad1               | Defender against cell death 1                                                           | 90        |                     |                                                                          |           |
| Dapk1_predicted    | Death associated protein kinase 1 (predicted)                                           | 191       |                     |                                                                          |           |
| Dffa (ICAD,DFF45)  | DNA fragmentation factor, alpha subunit                                                 | 134       |                     |                                                                          |           |
| Dffb (CAD,DFF40)   | DNA fragmentation factor, beta subunit                                                  | 186       |                     |                                                                          |           |
